# Supplementary material
Source: PubMed Central journal article supplement (PMC3078393)
Supplement: 1101752108_pnas.1101752108_SI.pdf [file 1101752108_pnas.1101752108_SI.pdf]

# Supporting Information

Banachewicz et al. 10.1073/pnas.1101752108

## SI Text

The  $\Phi$ -values were measured for the scheme

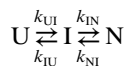

by

$$\Phi_{TS1} = \frac{\Delta\Delta G_{U-TS1}}{\Delta\Delta G_{U-N}} = \ln(k'_{UI}/k_{UI}) / \ln\left(\frac{(k'_{UI}/k'_{IU})(k'_{IN}/k'_{NI})}{(k_{UI}/k_{IU})(k_{IN}/k_{NI})}\right),$$

$$\Phi_{TS2} = \frac{\Delta\Delta G_{U-TS2}}{\Delta\Delta G_{U-N}} = \ln(k'_{UI}k'_{IU}k'_{IN}/k_{UI}k_{IU}k_{IN}) / \ln\left(\frac{(k'_{UI}/k'_{IU})(k'_{IN}/k'_{NI})}{(k_{UI}/k_{IU})(k_{IN}/k_{NI})}\right),$$

$$\Phi_I = \frac{\Delta\Delta G_{U-I}}{\Delta\Delta G_{U-N}} = \ln(k'_{UI}k_{IU}/k_{UI}k'_{IU}) / \ln\left(\frac{(k'_{UI}/k'_{IU})(k'_{IN}/k'_{NI})}{(k_{UI}/k_{IU})(k_{IN}/k_{NI})}\right),$$

and

where the prime denotes values for mutant protein.

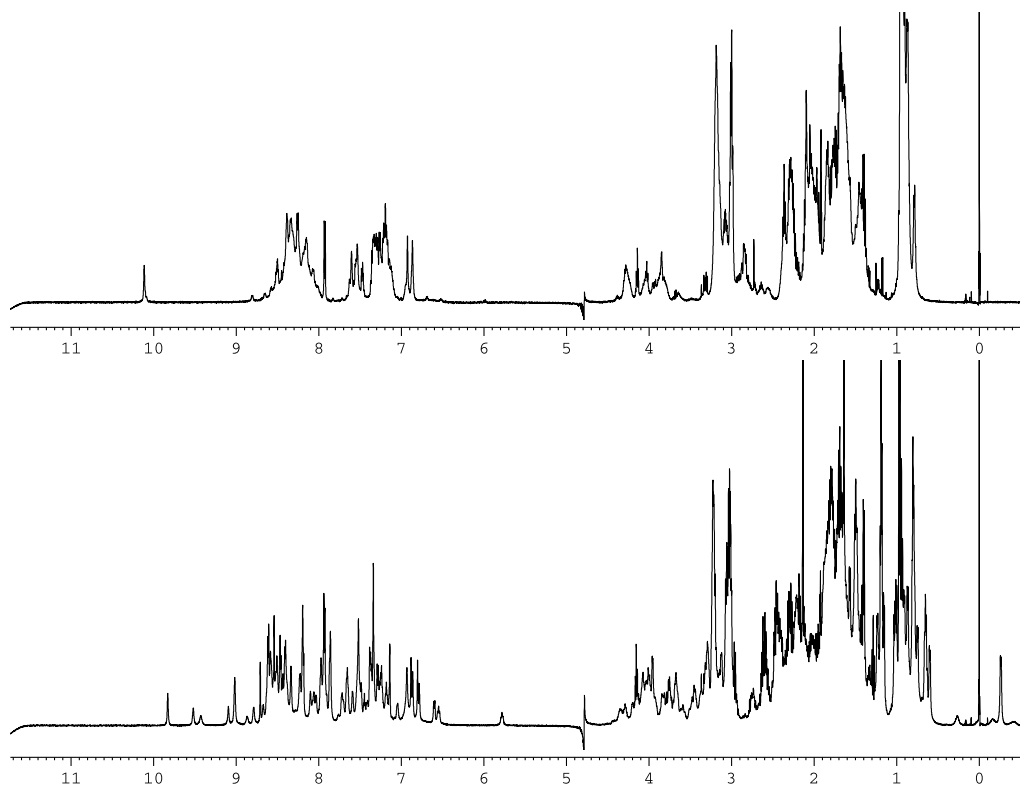

**Fig. S1.** One-dimensional NMR spectra of wild-type Pit1 (Lower) and peptide 16–60 (Upper, LERHFGHEHSKPSSQEIMRMAEELNLEKEVVRVWFNSNRRQREKRVK). All spectra were recorded in 50 mM acetate, pH 5.5, and 100 mM NaCl at 25 °C. Similar spectra were recorded for 16–60 at 500 mM acetate and pH 3 and pH 7 at both ionic strengths.







Table S1. Kinetic constants from free fit of chevron plots to three-state equations

|      | $k_{UI} \times 10^{-5}, s^{-1}$ | $-m_{UI},$<br>kcal mol <sup>-1</sup> M <sup>-1</sup> | $k_{IU} \times 10^{-4}, s^{-1}$ | $m_{IU},$<br>kcal mol <sup>-1</sup> M <sup>-1</sup> | $k_{IN} \times 10^{-4}, s^{-1}$ | $-m_{IN},$<br>kcal mol <sup>-1</sup> M <sup>-1</sup> | $k_{NI}, s^{-1}$ | $m_{NI},$<br>kcal mol <sup>-1</sup> M <sup>-1</sup> |
|------|---------------------------------|------------------------------------------------------|---------------------------------|-----------------------------------------------------|---------------------------------|------------------------------------------------------|------------------|-----------------------------------------------------|
| WT   | 2.96 ± 0.14                     | 0.19 ± 0.07                                          | 2.22 ± 1.50                     | 0.58 ± 0.13                                         | 1.61 ± 0.09                     | 0.10 ± 0.07                                          | 255 ± 46         | 0.30 ± 0.02                                         |
| I8V  | 1.80 ± 0.15                     | 0.28 ± 0.02                                          | 5.99 ± 0.85                     | 0.52 ± 0.04                                         | 1.92 ± 0.16                     | 0.00 ± 0.01                                          | 1019 ± 124       | 0.23 ± 0.01                                         |
| S9A  | 2.42 ± 0.06                     | 0.10 ± 0.06                                          | 0.41 ± 0.45                     | 1.34 ± 0.34                                         | 1.41 ± 0.05                     | 0.40 ± 0.07                                          | 2260 ± 219       | 0.19 ± 0.02                                         |
| I10A | 3.50 ± 0.15                     | 0.16 ± 0.04                                          | 0.31 ± 0.35                     | 0.79 ± 0.20                                         | 1.44 ± 0.06                     | 0.22 ± 0.04                                          | 420 ± 115        | 0.17 ± 0.03                                         |
| I10G | 3.56 ± 0.13                     | 0.11 ± 0.03                                          | 0.03 ± 0.04                     | 1.40 ± 0.29                                         | 1.49 ± 0.06                     | 0.32 ± 0.03                                          | 968 ± 168        | 0.14 ± 0.02                                         |
| A11G | 2.67 ± 0.19                     | 0.30 ± 0.12                                          | 1.24 ± 0.97                     | 0.87 ± 0.18                                         | 1.30 ± 0.09                     | 0.08 ± 0.13                                          | 1,170 ± 286      | 0.18 ± 0.04                                         |
| A12G | 1.66 ± 0.56                     | 0.38 ± 0.30                                          | 7.05 ± 5.09                     | 0.40 ± 0.19                                         | 2.04 ± 0.68                     | 0.02 ± 0.31                                          | 938 ± 169        | 0.30 ± 0.03                                         |
| K13A | 3.08 ± 0.05                     | 0.10 ± 0.01                                          | 0.15 ± 0.11                     | 0.71 ± 0.11                                         | 1.69 ± 0.03                     | 0.28 ± 0.01                                          | 171 ± 34         | 0.23 ± 0.02                                         |
| D14A | 3.42 ± 0.16                     | 0.14 ± 0.05                                          | 0.58 ± 0.80                     | 0.57–0.20                                           | 1.49 ± 0.06                     | 0.23 ± 0.05                                          | 77 ± 47          | 0.37 ± 0.06                                         |
| D14G | 2.32 ± 0.09                     | 0.07 ± 0.06                                          | 1.13 ± 0.80                     | 0.87 ± 0.15                                         | 1.18 ± 0.04                     | 0.15 ± 0.06                                          | 604 ± 78         | 0.26 ± 0.02                                         |
| A15G | 2.06 ± 1.21                     | 0.16 ± 0.41                                          | 2.59 ± 11.57                    | 0.68 ± 1.23                                         | 1.30 ± 0.82                     | 0.38 ± 0.49                                          | 1,642 ± 685      | 0.24 ± 0.07                                         |
| E17A | 2.47 ± 0.14                     | 0.00 ± 0.03                                          | 0.58 ± 0.95                     | 0.60 ± 0.31                                         | 1.67 ± 0.09                     | 0.45 ± 0.07                                          | 3,611 ± 1,228    | 0.20 ± 0.05                                         |
| R18A | 3.18 ± 0.08                     | 0.28 ± 0.04                                          | 1.67 ± 0.74                     | 0.66 ± 0.09                                         | 1.78 ± 0.05                     | 0.18 ± 0.05                                          | 1,250 ± 147      | 0.18 ± 0.02                                         |
| R18G | 1.88 ± 0.25                     | 0.34 ± 0.08                                          | 4.27 ± 1.46                     | 0.61 ± 0.12                                         | 1.83 ± 0.27                     | 0.00 ± 0.03                                          | 1,943 ± 655      | 0.23 ± 0.05                                         |
| F20A | 1.68 ± 0.55                     | 0.28 ± 0.36                                          | 6.19 ± 5.46                     | 0.53 ± 0.20                                         | 1.33 ± 0.39                     | 0.00 ± 0.33                                          | 3,592 ± 1,807    | 0.25 ± 0.10                                         |
| G21A | 2.73 ± 0.98                     | 0.25 ± 0.20                                          | 10.97 ± 9.49                    | 0.23 ± 0.13                                         | 2.32 ± 0.85                     | 0.12 ± 0.20                                          | 75 ± 35          | 0.27 ± 0.04                                         |
| E22A | 3.58 ± 0.10                     | 0.18 ± 0.04                                          | 0.40 ± 0.36                     | 0.97 ± 0.20                                         | 1.71 ± 0.05                     | 0.24 ± 0.04                                          | 791 ± 125        | 0.23 ± 0.02                                         |
| E22G | 3.65 ± 0.28                     | 0.36 ± 0.12                                          | 3.42 ± 2.86                     | 0.75 ± 0.26                                         | 1.82 ± 0.18                     | 0.10 ± 0.13                                          | 2,170 ± 407      | 0.19 ± 0.03                                         |
| S24A | 2.33 ± 0.14                     | 0.16 ± 0.03                                          | 0.23 ± 0.11                     | 0.96 ± 0.10                                         | 0.73 ± 0.03                     | 0.00 ± 0.02                                          | 403 ± 99         | 0.26 ± 0.03                                         |
| S24G | 4.12 ± 0.11                     | 0.09 ± 0.04                                          | 0.35 ± 0.52                     | 1.00 ± 0.33                                         | 1.46 ± 0.05                     | 0.28 ± 0.05                                          | 1,141 ± 335      | 0.25 ± 0.04                                         |
| P26A | 0.39 ± 1.06                     | 0.00 ± 0.00                                          | 15.18 ± 14.91                   | 0.20 ± 0.23                                         | 9.15 ± 25.11                    | 0.20 ± 1.16                                          | 615 ± 858        | 0.39 ± 0.16                                         |
| S27A | 2.11 ± 0.30                     | 0.00 ± 0.03                                          | 3.57 ± 2.13                     | 0.83 ± 0.20                                         | 1.07 ± 0.15                     | 0.42 ± 0.07                                          | 991 ± 185        | 0.23 ± 0.03                                         |
| S28A | 3.18 ± 0.13                     | 0.17 ± 0.05                                          | 0.51 ± 0.57                     | 0.68 ± 0.18                                         | 1.85 ± 0.08                     | 0.18 ± 0.05                                          | 380 ± 118        | 0.24 ± 0.03                                         |
| S28G | 2.62 ± 0.14                     | 0.15 ± 0.09                                          | 1.14 ± 1.24                     | 0.85 ± 0.25                                         | 0.99 ± 0.05                     | 0.12 ± 0.10                                          | 337 ± 81         | 0.29 ± 0.03                                         |
| I31V | 2.31 ± 0.30                     | 0.31 ± 0.05                                          | 5.33 ± 1.59                     | 0.53 ± 0.08                                         | 1.32 ± 0.17                     | 0.00 ± 0.01                                          | 309 ± 114        | 0.40 ± 0.05                                         |
| M32A | 3.02 ± 0.07                     | 0.15 ± 0.02                                          | 0.21 ± 0.09                     | 0.83 ± 0.07                                         | 1.52 ± 0.03                     | 0.27 ± 0.01                                          | 228 ± 57         | 0.24 ± 0.02                                         |
| M32G | 2.43 ± 0.14                     | 0.24 ± 0.09                                          | 1.83 ± 1.32                     | 0.71 ± 0.16                                         | 0.62 ± 0.04                     | 0.02 ± 0.10                                          | 336 ± 64         | 0.20 ± 0.02                                         |
| M34A | 1.27 ± 0.02                     | 0.00 ± 0.00                                          | 0.00 ± 0.00                     | 3.09 ± 4.53                                         | 0.79 ± 0.05                     | 0.39 ± 0.10                                          | 295 ± 542        | 0.53 ± 0.40                                         |
| A35G | 2.02 ± 0.36                     | 0.00 ± 0.01                                          | 6.45 ± 2.81                     | 1.05 ± 0.25                                         | 0.57 ± 0.11                     | 0.18 ± 0.09                                          | 491 ± 120        | 0.25 ± 0.04                                         |
| E37A | 2.18 ± 0.05                     | 0.19 ± 0.05                                          | 0.73 ± 0.37                     | 1.09 ± 0.14                                         | 1.27 ± 0.03                     | 0.13 ± 0.05                                          | 1,320 ± 87       | 0.21 ± 0.01                                         |
| E37G | 1.97 ± 0.61                     | 0.00 ± 0.08                                          | 18.62 ± 4.72                    | 0.82 ± 0.10                                         | 1.81 ± 0.56                     | 0.01 ± 0.08                                          | 393 ± 285        | 0.54 ± 0.16                                         |
| N39A | 2.44 ± 0.21                     | 0.23 ± 0.06                                          | 3.20 ± 1.17                     | 0.76 ± 0.11                                         | 0.96 ± 0.10                     | 0.00 ± 0.03                                          | 635 ± 218        | 0.23 ± 0.05                                         |
| L40V | 2.67 ± 0.07                     | 0.20 ± 0.04                                          | 0.21 ± 0.23                     | 1.14 ± 0.29                                         | 1.17 ± 0.03                     | 0.25 ± 0.04                                          | 657 ± 109        | 0.33 ± 0.02                                         |
| E41A | 2.80 ± 0.16                     | 0.23 ± 0.10                                          | 1.59 ± 1.54                     | 0.74 ± 0.22                                         | 2.09 ± 0.13                     | 0.15 ± 0.10                                          | 1,234 ± 249      | 0.20 ± 0.02                                         |
| E41G | 1.67 ± 1.25                     | 0.06 ± 0.56                                          | 6.44 ± 10.65                    | 0.72 ± 0.41                                         | 2.77 ± 2.11                     | 0.00 ± 0.60                                          | 867 ± 650        | 0.32 ± 0.11                                         |
| K42A | 2.57 ± 1.39                     | 0.22 ± 0.14                                          | 7.05 ± 12.60                    | 0.05 ± 0.16                                         | 3.3 ± 1.78                      | 0.15 ± 0.15                                          | 11 ± 12          | 0.40 ± 0.08                                         |
| E43A | 2.37 ± 0.13                     | 0.31 ± 0.03                                          | 7.21 ± 0.81                     | 0.60 ± 0.04                                         | 1.17 ± 0.07                     | 0.00 ± 0.02                                          | 829 ± 88         | 0.25 ± 0.02                                         |
| E43G | 2.32 ± 0.18                     | 0.32 ± 0.07                                          | 4.70 ± 1.54                     | 0.79 ± 0.16                                         | 0.90 ± 0.09                     | 0.00 ± 0.04                                          | 782 ± 88         | 0.26 ± 0.02                                         |
| V44A | 2.92 ± 0.13                     | 0.27 ± 0.03                                          | 1.13 ± 0.30                     | 1.01 ± 0.08                                         | 1.67 ± 0.08                     | 0.00 ± 0.01                                          | 1,887 ± 186      | 0.15 ± 0.01                                         |
| R46A | 1.81 ± 0.05                     | 0.12 ± 0.03                                          | 0.35 ± 0.22                     | 0.68 ± 0.11                                         | 0.94 ± 0.03                     | 0.02 ± 0.03                                          | 385 ± 100        | 0.23 ± 0.02                                         |
| V47A | 2.66 ± 0.07                     | 0.14 ± 0.01                                          | 0.01 ± 0.01                     | 1.23 ± 0.22                                         | 2.42 ± 0.06                     | 0.27 ± 0.01                                          | 892 ± 141        | 0.19 ± 0.02                                         |
| V47G | 1.97 ± 0.05                     | 0.19 ± 0.04                                          | 0.58 ± 0.45                     | 0.65 ± 0.15                                         | 1.71 ± 0.04                     | 0.23 ± 0.04                                          | 663 ± 180        | 0.31 ± 0.04                                         |
| F49A | 11.93 ± 3.73                    | 0.25 ± 0.46                                          | 50.33 ± 38.67                   | 0.88 ± 0.22                                         | 1.09 ± 0.33                     | 0.00 ± 0.10                                          | 4,108 ± 1,000    | 0.21 ± 0.06                                         |
| S50A | 3.72 ± 0.12                     | 0.16 ± 0.03                                          | 0.19 ± 0.17                     | 0.84 ± 0.15                                         | 1.65 ± 0.06                     | 0.22 ± 0.03                                          | 450 ± 92         | 0.18 ± 0.02                                         |
| S50G | 2.44 ± 0.22                     | 0.37 ± 0.04                                          | 6.36 ± 1.24                     | 0.58 ± 0.07                                         | 1.61 ± 0.15                     | 0.00 ± 0.00                                          | 862 ± 162        | 0.24 ± 0.03                                         |

The fast and slow phases for each mutant were fitted simultaneously to the standard equations for three-state chevron plots. Experiments were performed in 50 mM acetate, 100 mM NaCl (pH 5.5) at 25.0 °C;  $k_{UI}$  is the rate constant for U → I, etc.

Table S2. Kinetic parameters from global fit of chevron plots to three-state equations

|      | $k_{UI} \times 10^{-5}, s^{-1}$ | $k_{IU} \times 10^{-4}, s^{-1}$ | $k_{IN} \times 10^{-4}, s^{-1}$ | $k_{NI}, s^{-1}$ | $\Delta G_{(U-N)kin}, kcal/mol$ |
|------|---------------------------------|---------------------------------|---------------------------------|------------------|---------------------------------|
| WT   | 3.19 ± 0.09                     | 0.90 ± 0.18                     | 1.69 ± 0.05                     | 480 ± 28         | 4.22 ± 0.12                     |
| I8V  | 2.43 ± 0.11                     | 2.10 ± 0.33                     | 1.66 ± 0.07                     | 1017 ± 50        | 3.10 ± 0.10                     |
| S9A  | 1.98 ± 0.09                     | 2.78 ± 0.37                     | 1.58 ± 0.07                     | 1679 ± 69        | 2.49 ± 0.09                     |
| I10A | 3.45 ± 0.11                     | 0.35 ± 0.09                     | 1.50 ± 0.05                     | 225 ± 15         | 5.20 ± 0.15                     |
| I10G | 3.43 ± 0.08                     | 0.69 ± 0.04                     | 1.51 ± 0.04                     | 428 ± 10         | 4.43 ± 0.04                     |
| A11G | 2.28 ± 0.09                     | 1.65 ± 0.27                     | 1.61 ± 0.07                     | 781 ± 39         | 3.35 ± 0.11                     |
| A12G | 2.09 ± 0.07                     | 2.02 ± 0.29                     | 1.42 ± 0.05                     | 1317 ± 60        | 2.79 ± 0.10                     |
| K13A | 3.27 ± 0.09                     | 0.19 ± 0.05                     | 1.56 ± 0.04                     | 163 ± 11         | 5.76 ± 0.17                     |
| D14A | 3.46 ± 0.09                     | 0.27 ± 0.07                     | 1.38 ± 0.04                     | 254 ± 17         | 5.24 ± 0.16                     |
| D14G | 2.48 ± 0.10                     | 1.92 ± 0.31                     | 1.40 ± 0.06                     | 730 ± 36         | 3.26 ± 0.10                     |
| A15G | 1.86 ± 0.09                     | 3.03 ± 0.43                     | 1.23 ± 0.07                     | 1,580 ± 65       | 2.29 ± 0.10                     |
| E17A | 2.19 ± 0.10                     | 2.91 ± 0.38                     | 1.65 ± 0.08                     | 4,266 ± 553      | 2.00 ± 0.12                     |
| R18A | 2.88 ± 0.09                     | 0.94 ± 0.18                     | 1.77 ± 0.06                     | 782 ± 46         | 3.87 ± 0.12                     |
| R18G | 2.03 ± 0.10                     | 2.23 ± 0.34                     | 1.76 ± 0.09                     | 1,846 ± 93       | 2.64 ± 0.10                     |
| F20A | 2.07 ± 0.09                     | 2.78 ± 0.40                     | 1.11 ± 0.06                     | 3,838 ± 161      | 1.81 ± 0.10                     |
| G21A | 4.33 ± 0.13                     | 0.54 ± 0.14                     | 1.47 ± 0.05                     | 123 ± 8          | 5.42 ± 0.16                     |
| E22A | 3.20 ± 0.10                     | 1.00 ± 0.19                     | 1.76 ± 0.06                     | 693 ± 41         | 3.97 ± 0.12                     |
| E22G | 3.29 ± 0.14                     | 2.40 ± 0.45                     | 1.91 ± 0.09                     | 1482 ± 83        | 3.06 ± 0.12                     |
| S24A | 2.51 ± 0.18                     | 0.43 ± 0.07                     | 1.08 ± 0.06                     | 491 ± 24         | 4.24 ± 0.11                     |
| S24G | 4.09 ± 0.08                     | 1.30 ± 0.08                     | 1.47 ± 0.04                     | 1,223 ± 25       | 3.51 ± 0.04                     |
| P26A | 2.94 ± 0.12                     | 1.51 ± 0.14                     | 1.18 ± 0.06                     | 1,810 ± 80       | 2.87 ± 0.07                     |
| S27A | 1.84 ± 0.15                     | 6.04 ± 0.74                     | 1.18 ± 0.10                     | 962 ± 42         | 2.14 ± 0.10                     |
| S28A | 3.15 ± 0.08                     | 0.34 ± 0.08                     | 1.96 ± 0.05                     | 382 ± 25         | 5.01 ± 0.15                     |
| S28G | 2.60 ± 0.10                     | 1.50 ± 0.13                     | 1.11 ± 0.04                     | 486 ± 14         | 3.54 ± 0.06                     |
| I31V | 2.47 ± 0.10                     | 2.19 ± 0.35                     | 1.13 ± 0.05                     | 890 ± 42         | 2.94 ± 0.10                     |
| M32A | 3.06 ± 0.08                     | 0.30 ± 0.07                     | 1.52 ± 0.04                     | 247 ± 15         | 5.18 ± 0.15                     |
| M32G | 2.60 ± 0.09                     | 0.98 ± 0.09                     | 0.73 ± 0.03                     | 261 ± 7          | 3.91 ± 0.07                     |
| M34A | 1.23 ± 0.04                     | 0.68 ± 0.12                     | 0.64 ± 0.03                     | 1,137 ± 65       | 2.73 ± 0.12                     |
| A35G | 1.69 ± 0.19                     | 10.82 ± 1.29                    | 0.76 ± 0.09                     | 518 ± 21         | 1.85 ± 0.12                     |
| E37A | 1.91 ± 0.06                     | 1.92 ± 0.13                     | 1.46 ± 0.04                     | 1,051 ± 17       | 2.92 ± 0.05                     |
| E37G | 1.62 ± 0.27                     | 23.23 ± 1.07                    | 2.30 ± 0.36                     | 1,500 ± 44       | 1.40 ± 0.14                     |
| N39A | 2.61 ± 0.11                     | 2.59 ± 0.39                     | 1.11 ± 0.05                     | 643 ± 32         | 3.06 ± 0.10                     |
| L40V | 2.20 ± 0.08                     | 1.02 ± 0.19                     | 1.12 ± 0.04                     | 1,119 ± 55       | 3.18 ± 0.12                     |
| E41A | 2.72 ± 0.10                     | 1.22 ± 0.22                     | 2.22 ± 0.08                     | 883 ± 51         | 3.75 ± 0.12                     |
| E41G | 2.21 ± 0.39                     | 5.13 ± 2.35                     | 2.77 ± 0.50                     | 1,632 ± 78       | 2.54 ± 0.31                     |
| K42A | 3.38 ± 0.06                     | 0.02 ± 0.00                     | 2.43 ± 0.04                     | 125 ± 4          | 7.58 ± 0.06                     |
| E43A | 2.72 ± 0.13                     | 3.78 ± 0.54                     | 1.08 ± 0.05                     | 896 ± 40         | 2.64 ± 0.10                     |
| E43G | 2.33 ± 0.20                     | 3.65 ± 0.98                     | 0.93 ± 0.05                     | 907 ± 16         | 2.48 ± 0.17                     |
| V44A | 2.77 ± 0.16                     | 1.90 ± 0.18                     | 2.41 ± 0.14                     | 970 ± 36         | 3.49 ± 0.08                     |
| R46A | 1.89 ± 0.04                     | 0.28 ± 0.02                     | 0.91 ± 0.02                     | 362 ± 5          | 4.40 ± 0.04                     |
| V47A | 2.55 ± 0.05                     | 0.14 ± 0.01                     | 2.39 ± 0.04                     | 555 ± 14         | 5.29 ± 0.04                     |
| V47G | 1.84 ± 0.04                     | 0.40 ± 0.08                     | 1.56 ± 0.04                     | 971 ± 56         | 3.92 ± 0.13                     |
| F49A | 9.77 ± 0.84                     | 67.25 ± 3.45                    | 1.49 ± 0.12                     | 3,881 ± 112      | 1.02 ± 0.08                     |
| S50A | 3.55 ± 0.09                     | 0.29 ± 0.07                     | 1.73 ± 0.05                     | 237 ± 16         | 5.38 ± 0.16                     |
| S50G | 2.64 ± 0.10                     | 3.02 ± 0.19                     | 1.47 ± 0.05                     | 900 ± 23         | 2.94 ± 0.05                     |

The fast and slow phases for each mutant were fitted simultaneously to the standard equations for three-state chevron plots, and the results for all mutants were simultaneously fitted assuming that each rate constant had a common value throughout the series. Values reported at 0 M urea. The global  $m$  values ( $kcal\ mol^{-1}\ M^{-1}$ ) obtained from the fit were  $m_{UI}$ , -0.14;  $m_{IU}$ , 0.73;  $m_{IN}$ , -0.23; and  $m_{NI}$ , 0.24.

**Table S3. Mutants of Pit1 chosen for  $\Phi$ -analysis, their interactions and accessible solvent exposed area (ASA)**

| Mutant | Location   | % ASA | Residue (no. of contacts removed)                                                                                                                          | Overall interaction probed                         |
|--------|------------|-------|------------------------------------------------------------------------------------------------------------------------------------------------------------|----------------------------------------------------|
| I8V    | N term     | 18.3  | Thr6(4), Thr7(3), Leu16(1),Leu40(3), Val44(5), Trp48(7)                                                                                                    | packing of the hydrophobic core                    |
| S9A    | N cap      | 71.3  | Ile8(4), Ile10(5), Ala11(5), Ala12(4), Lys13(1)                                                                                                            | degree of formation of H1                          |
| I10A   | helix 1    | 100   | Ile8(1), Ser9(7), Ala11(6), Asp14(4)                                                                                                                       | local interactions within H1                       |
| I10G   | helix 1    | 100   | Ile8(2), Ser9(12), Ala11(10),Ala12(1), Lys13(1), Asp14(7)                                                                                                  | degree of formation of H1 -Ala → Gly scan          |
| A11G   | helix 1    | 100   | Ser9(5), Ile10(6), Ala12(4), Lys13(1), Asp14(4)                                                                                                            | degree of formation of H1 -Ala → Gly scan          |
| A12G   | helix 1    | 9.2   | Ile8(6), Ser9(6), Ile10(4), Ala11(5), Lys13(4), Asp14(1),Leu16(2), Leu38(5), Leu40(3)                                                                      | packing of the hydrophobic core                    |
| K13A   | helix 1    | 71.2  | Ile8(3), Ser9(4), Ile10(7), Ala12(2), Asp14(11), Leu16(1), Glu17(2), Trp48(7)                                                                              | local interactions within H1 and between H1 and H3 |
| D14A   | helix 1    | 65.6  | Ile10(15), Ala11(14), Ala12(3), Lys13(15), Ala15(4)                                                                                                        | local interactions within H1                       |
| D14G   | helix 1    | 65.6  | Ile10(19), Ala11(19), Ala12(7),Lys13(21), Ala15(8), Leu16(1)                                                                                               | degree of formation of H1 -Ala → Gly scan          |
| A15G   | helix 1    | 29.1  | Ala11(2), Ala12(4), Lys13(3), Asp14(5), Leu16(6), Glu17(1), Arg18(3), His19(4), Met34(1), Glu37(3), Leu38(3)                                               | packing of the hydrophobic core                    |
| E17A   | helix 1    | 47.6  | Lys13(1), Leu16(6), Arg18(8), Phe20(26), Gly21(5), Trp48(4), Arg52(22)                                                                                     | local interactions within H1 and between H1 and H3 |
| R18A   | helix 1    | 69.1  | Asp14(5), Ala15(11), Glu17(2), His19(20), Glu22(14)                                                                                                        | local interactions within H1                       |
| R18G   | helix 1    | 69.1  | Asp14(7), Ala15(16), Leu16(4),Glu17(7), His19(27), Glu22(18)                                                                                               | degree of formation of H1 -Ala → Gly scan          |
| F20A   | helix 1    | 8.1   | Leu16(3), Glu17(20), His19(6), Gly21(9), His23(5), Ser24(24), Lys25(2), Trp48(10), Phe49(24),Arg52(35), Arg53(11), Glu56(8)                                | packing of the hydrophobic core                    |
| G21A   | helix 1    | 74.1  | N/A                                                                                                                                                        | local interactions within H1                       |
| E22A   | helix 1    | 61.4  | Arg18(29), His19(29), Phe20(4),Gly21(5), His23(4)                                                                                                          | local interactions within H1                       |
| E22G   | helix 1    | 61.4  | Arg18(32), His19(34), Phe20(8),Gly21(9), His23(9)                                                                                                          | degree of formation of H1 -Ala → Gly scan          |
| S24A   | loop       | 56    | Phe20(10), His23(2), Lys25(3),Phe49(2), Arg53(8), Glu56(3)                                                                                                 | local interactions within the loop                 |
| S24G   | loop       | 56    | Phe20(10), His23(2), Lys25(3),Phe49(2), Arg53(8), Glu56(3)                                                                                                 | degree of the loop between H1 and H2 formation     |
| P26A   | loop       | 0.3   | His19(1), His23(18), Ser24(9), Lys25(10), Ser27(6), Glu30(8), Ile31(7), Met34(2), Phe49(14), Arg53(4)                                                      | packing of the hydrophobic core                    |
| S27A   | N cap      | 60    | Pro26(4), Ser28(5), Gln29(9), Glu30(7), Ile31(1)                                                                                                           | degree of formation of H2                          |
| S28A   | helix 2    | 91.3  | Ser27(2), Gln29(2), Ile31(1)                                                                                                                               | local interactions within H2                       |
| S28G   | helix 2    | 91.3  | Ser27(2), Gln29(2), Ile31(1)                                                                                                                               | degree of formation of H2 -Ala → Gly scan          |
| I31V   | helix 2    | 7.7   | Pro26(7), Ser27(4), Ser28(3), Glu30(1), Met32(1), Lys42(2), Val45(5), Arg46(7), Phe49(4), Arg53(1)                                                         | packing of the hydrophobic core                    |
| M32A   | helix 2    | 58.8  | Ser28(3), Gln29(5), Ile31(3), Arg33(5), Ala35(2), Glu36(12), Lys42(12)                                                                                     | local interactions within H2 and between H2 and H3 |
| M32G   | helix 2    | 58.8  | Ser28(3), Gln29(5), Ile31(3), Arg33(5), Ala35(2), Glu36(12), Lys42(12)                                                                                     | degree of formation of H2 -Ala → Gly scan          |
| M34A   | helix 2    | 3.1   | Ala15(3), Leu16(12), His19(23),Phe20(1), Pro26(3), Glu30(9), Ile31(10), Arg33(5), Ala35(2), Glu37(4), Leu38(3), Val45(4), Phe49(10)                        | packing of the hydrophobic core                    |
| A35G   | helix 2    | 5.5   | Ile31(4), Met32(7), Arg33(4), Met34(5), Glu36(5), Glu37(1), Asn39(1), Leu40(5), Glu41(4), Lys42(6), Val45(4)                                               | packing of the hydrophobic core                    |
| E37A   | helix 2    | 49.9  | Ala15(4), His19(9), Arg33(6),Met34(22), Glu36(2), Leu38(22)                                                                                                | local interactions within H2 and between H1 and H2 |
| E37G   | helix 2    | 49.9  | Arg33(9), Met34(28), Ala35(4),Glu36(7), Leu38(29), Asn39(1)                                                                                                | degree of formation of H2 -Ala → Gly scan          |
| N39A   | turn/C cap | 100   | Ala35(2), Glu36(4), Leu38(7), Leu40(6)                                                                                                                     | degree of formation of H2                          |
| L40V   | turn       | 12.8  | Thr6(1), Thr7(1), Ile8(3), Ala12(1), Leu38(3), Asn39(2),Glu41(1), Val44(3), Val45(1)                                                                       | packing of the hydrophobic core                    |
| E41A   | turn/N cap | 89.5  | Leu40(11), Lys42(3), Glu43(1), Val44(4)                                                                                                                    | degree of formation of H3                          |
| E41G   | turn       | 89.5  | Leu40(16), Lys42(8), Glu43(6), Val44(8)                                                                                                                    | degree of formation of the turn                    |
| K42A   | helix 3    | 44.1  | Ser27(2), Ser28(15), Gln29(1), Ile31(20), Met32(24), Ala35(1), Glu41(2), Glu43(6), Val45(2), Arg46(6)                                                      | local interactions within H3 and between H2 and H3 |
| E43A   | helix 3    | 66    | Glu41(1), Lys42(6), Val44(7), Arg46(29), Val47(11)                                                                                                         | local interactions within H3                       |
| E43G   | helix 3    | 66    | Glu41(5), Lys42(12), Val44(12),Val45(1), Arg46(33), Val47(12)                                                                                              | degree of formation of H3 -Ala → Gly scan          |
| V44A   | helix 3    | 19.9  | Thr6(9), Ile8(3), Leu40(12), Glu41(10), Lys42(3), Glu43(8), Val45(6), Trp48(1)                                                                             | packing of the hydrophobic core                    |
| R46A   | helix 3    | 50.9  | Ile31(6), Lys42(8), Val45(2),Glu43(36), Val47(23), Ser50(8)                                                                                                | local interactions within H3 and between H2 and H3 |
| V47A   | helix 3    | 53.8  | Glu43(9), Val44(5), Val45(1), Arg46(14), Trp48(6), Ser50(4), Asn51(7)                                                                                      | local interactions within H3                       |
| V47G   | helix 3    | 53.8  | Glu43(15), Val44(9), Val45(4),Arg46(23), Trp48(10), Phe49(1),Ser50(7), Asn51(10)                                                                           | degree of formation of H3 -Ala → Gly scan          |
| F49A   | helix 3    | 0.1   | Leu16(15), His19(11), Phe20(33),His23(7), Ser24(16), Lys25(8),Pro26(28), Ile31(10), Met34(11),Val45(16), Arg46(8), Trp48(32),Ser50(4), Arg52(3), Arg53(15) | packing of the hydrophobic core                    |
| S50A   | helix 3    | 43    | Arg46(10), Val47(6), Trp48(2),Phe49(5), Asn51(1), Arg53(4)                                                                                                 | local interactions within H3                       |
| S50G   | helix 3    | 43    | Arg46(14), Val47(12), Trp48(5),Phe49(10), Asn51(7), Arg52(1),Arg53(10)                                                                                     | local interactions within H3                       |

**Table S4.  $\Phi$ -values at individual positions in Pit1**

|      | Position      | Interaction, s | $\Delta\Delta G_{(U-D)}$ , kcal/mol | $\Phi_{TS1}$ | $\Phi_I$    | $\Phi_{TS2}$ |
|------|---------------|----------------|-------------------------------------|--------------|-------------|--------------|
| I8V  | N terminus    | H1/core        | -1.12                               | 0.14 ± 0.03  | 0.59 ± 0.09 | 0.60 ± 0.09  |
| S9A  | N cap H1      | H1             | -1.73                               | 0.16 ± 0.02  | 0.55 ± 0.05 | 0.57 ± 0.05  |
| I10A | H1            | H1             | 0.98                                | 0.05 ± 0.03  | 0.61 ± 0.13 | 0.54 ± 0.11  |
| K13A | H1            | H1             | 1.54                                | 0.01 ± 0.01  | 0.62 ± 0.09 | 0.59 ± 0.08  |
| D14A | H1            | H1             | 1.02                                | 0.05 ± 0.02  | 0.75 ± 0.15 | 0.63 ± 0.13  |
| E17A | H1            | H1/H2          | -2.22                               | 0.1 ± 0.02   | 0.41 ± 0.03 | 0.42 ± 0.03  |
| R18A | H1            | H1             | -0.35                               | ND           | ND          | ND           |
| F20A | H1            | core           | -2.41                               | 0.11 ± 0.01  | 0.38 ± 0.03 | 0.49 ± 0.03  |
| G21A | H1            | H1             | 1.2                                 | 0.15 ± 0.03  | 0.4 ± 0.07  | 0.33 ± 0.06  |
| E22A | H1            | H1             | -0.25                               | ND           | ND          | ND           |
| S24A | loop          | H1/H3          | 0.02                                | ND           | ND          | ND           |
| S24G | loop          | H1/H3          | -0.71                               | -0.21 ± 0.05 | 0.1 ± 0.03  | 0.22 ± 0.05  |
| P26A | loop          | core           | -1.35                               | 0.04 ± 0.02  | 0.26 ± 0.04 | 0.42 ± 0.05  |
| S27A | N cap H2      | H2             | -2.08                               | 0.16 ± 0.03  | 0.7 ± 0.06  | 0.8 ± 0.07   |
| S28A | H2            | H2             | 0.79                                | -0.01 ± 0.03 | 0.72 ± 0.18 | 0.83 ± 0.21  |
| I31V | H2            | core           | -1.28                               | 0.12 ± 0.03  | 0.53 ± 0.07 | 0.71 ± 0.09  |
| M32A | H2            | H2/H3          | 0.96                                | -0.03 ± 0.02 | 0.66 ± 0.14 | 0.59 ± 0.12  |
| M34A | H2            | core           | -1.49                               | 0.38 ± 0.05  | 0.27 ± 0.04 | 0.66 ± 0.08  |
| E37A | H2            | H1/H2          | -1.3                                | 0.23 ± 0.03  | 0.58 ± 0.06 | 0.64 ± 0.07  |
| N39A | C cap H2/turn | H2             | -1.16                               | 0.10 ± 0.03  | 0.64 ± 0.09 | 0.85 ± 0.12  |
| L40V | turn          | core           | -1.04                               | 0.21 ± 0.04  | 0.28 ± 0.05 | 0.52 ± 0.09  |
| E41A | N cap H1/turn | H3             | -0.47                               | 0.20 ± 0.09  | 0.58 ± 0.22 | 0.24 ± 0.10  |
| E41G | N cap H1/turn | H3             | -1.68                               | 0.13 ± 0.07  | 0.74 ± 0.16 | 0.57 ± 0.13  |
| K42A | H3            | H2/H3          | 3.36                                | 0.01 ± 0.01  | 0.70 ± 0.03 | 0.76 ± 0.03  |
| E43A | H3            | H3             | -1.58                               | 0.06 ± 0.02  | 0.60 ± 0.06 | 0.77 ± 0.08  |
| V44A | H3            | core           | -0.73                               | 0.11 ± 0.06  | 0.72 ± 0.15 | 0.43 ± 0.10  |
| R46A | H3            | H2/H3          | 0.18                                | ND           | ND          | ND           |
| V47A | H3            | H3             | 1.07                                | -0.12 ± 0.02 | 0.89 ± 0.11 | 1.08 ± 0.13  |
| F49A | H3            | core           | -3.2                                | -0.21 ± 0.02 | 0.59 ± 0.03 | 0.61 ± 0.03  |
| S50A | H3            | H3             | 1.16                                | 0.06 ± 0.02  | 0.63 ± 0.11 | 0.64 ± 0.11  |
| S50G | H3            | H3             | -1.28                               | 0.09 ± 0.02  | 0.65 ± 0.07 | 0.71 ± 0.08  |

Calculated from data from global analysis at 0 M denaturant (Table S2). Errors are the standard errors calculated from those propagated mathematically from the errors determined for each rate constant. ND, not determined

**Table S5.  $\Phi$ -values for Ala → Gly scanning of helices**

|                   | Position | Interaction, s | $\Delta\Delta G_{(U-N)}$ , kcal/mol | $\Phi_{TS1}$ | $\Phi_I$    | $\Phi_{TS2}$ |
|-------------------|----------|----------------|-------------------------------------|--------------|-------------|--------------|
| A10G*             | H1       | H1             | -0.77                               | 0.00 ± 0.03  | 0.51 ± 0.11 | 0.51 ± 0.11  |
| A11G <sup>†</sup> | H1       | H1             | -0.87                               | 0.23 ± 0.05  | 0.64 ± 0.12 | 0.67 ± 0.13  |
| A12G <sup>†</sup> | H1       | H1/core        | -1.43                               | 0.18 ± 0.03  | 0.51 ± 0.06 | 0.58 ± 0.07  |
| A14G*             | H1       | H1             | -1.98                               | 0.10 ± 0.02  | 0.69 ± 0.07 | 0.68 ± 0.07  |
| A15G <sup>†</sup> | H1       | H1/core        | -1.93                               | 0.17 ± 0.02  | 0.54 ± 0.05 | 0.63 ± 0.05  |
| A18G*             | H1       | H1             | -1.23                               | 0.17 ± 0.04  | 0.58 ± 0.08 | 0.58 ± 0.08  |
| A22G*             | H1       | H1             | -0.91                               | -0.02 ± 0.03 | 0.56 ± 0.11 | 0.50 ± 0.10  |
| A28G*             | H2       | H2             | -1.47                               | 0.08 ± 0.02  | 0.68 ± 0.08 | 0.9 ± 0.1    |
| A32G*             | H2       | H2/H3          | -1.27                               | 0.08 ± 0.02  | 0.63 ± 0.08 | 0.97 ± 0.13  |
| A35G <sup>†</sup> | H2       | core           | -2.37                               | 0.16 ± 0.03  | 0.78 ± 0.07 | 0.98 ± 0.08  |
| A37G*             | H2       | H1/H2          | -1.52                               | 0.07 ± 0.07  | 1.04 ± 0.12 | 0.86 ± 0.11  |
| A47G*             | H3       | H3             | -1.37                               | 0.14 ± 0.02  | 0.57 ± 0.06 | 0.76 ± 0.07  |

\*Calculated from the data for Table S2 using the values of wild type → Ala and wild type → Gly.

<sup>†</sup>Wild-type protein has Ala at these positions.
